# Supplementary material
Source: PubMed Central journal article supplement (PMC9637789)
Supplement: mmc1.pdf [file mmc1.pdf]

## Supporting Information

### **Reconstitution of the SARS-CoV-2 ribonucleosome provides insights into genomic RNA packaging and regulation by phosphorylation**

Christopher R. Carlson, Armin N. Adly, Maxine Bi, Conor J. Howard, Adam Frost, Yifan Cheng, and David O. Morgan

Figures S1-S4

Tables S1, S2

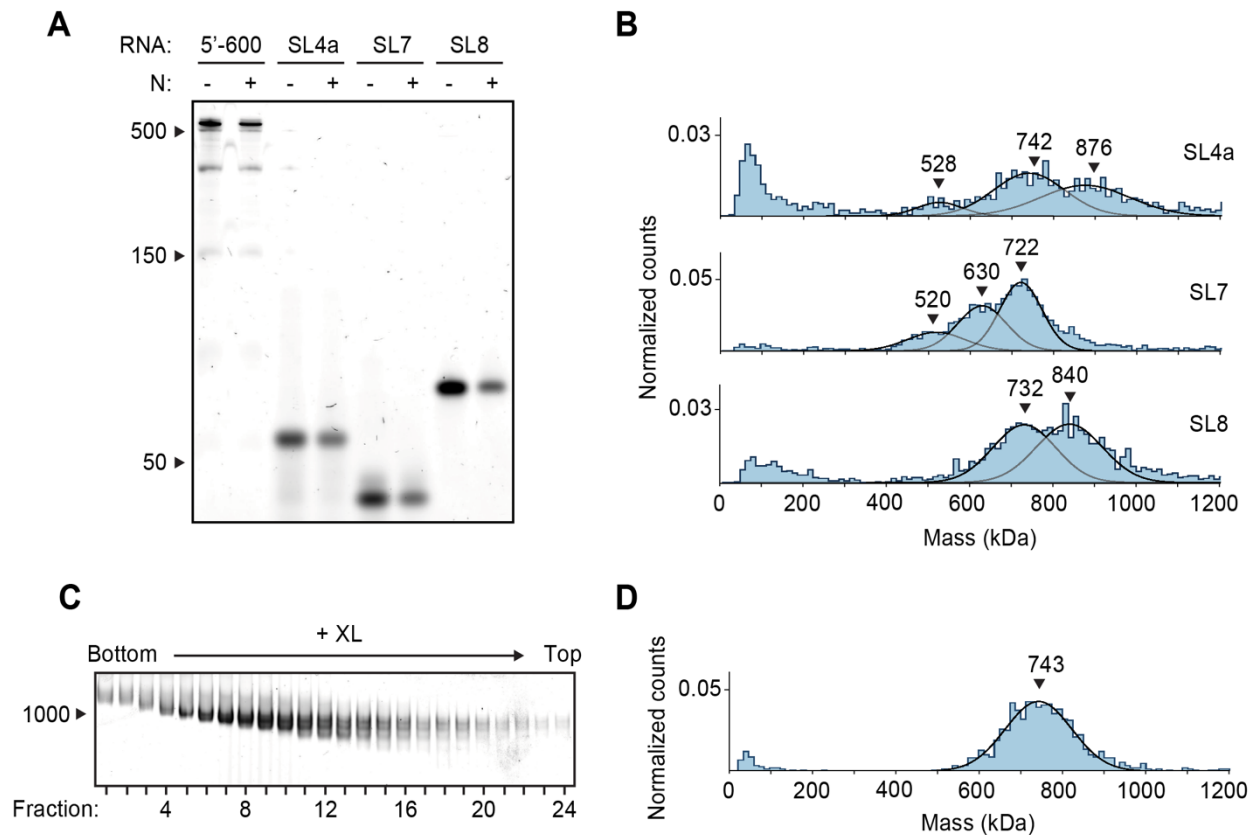

**Figure S1. vRNP formation with stem-loop RNAs.** *A*, Denaturing gel electrophoresis of N protein mixed with indicated RNAs, from samples shown in Fig. 2B. RNA length standards shown on left (nt). *B*, Mass photometry analyses of crosslinked N protein complexes with indicated RNAs. Results with SL8 are reproduced in Fig. 2D. Representative of two independent experiments (Table S1). *C*, N protein in complex with SL8 RNA was separated by glycerol gradient centrifugation in the presence of crosslinker (GraFix) and analyzed by native gel electrophoresis. RNA length standard shown on left (nt). *D*, Fractions 7 and 8 of GraFix-purified N-SL8 vRNPs (from *C*) were combined and analyzed by mass photometry. Representative of two independent experiments (Table S1).

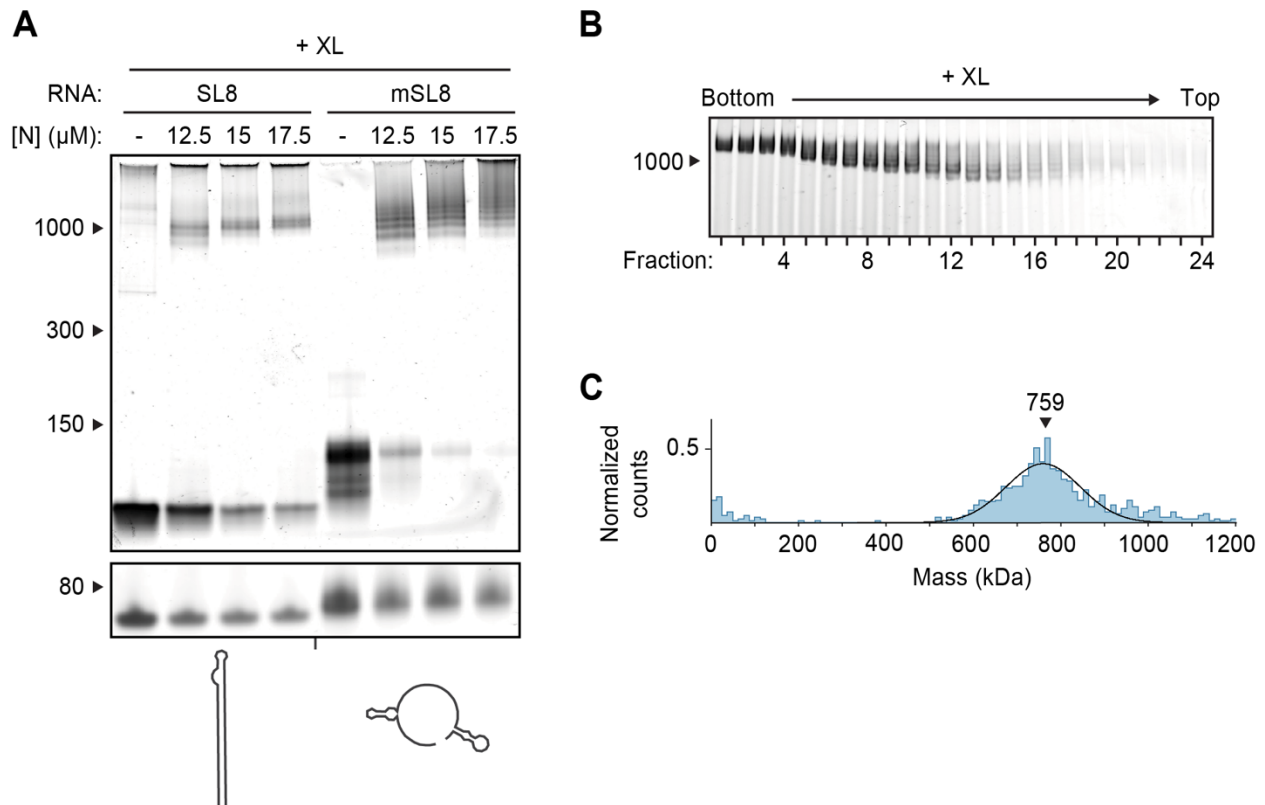

**Figure S2. Analysis of vRNP formation with mSL8 RNA.** *A*, The indicated concentrations of N protein were combined with SL8 RNA or mutant SL8 RNA (mSL8), crosslinked, and analyzed by native (top) and denaturing (bottom) gel electrophoresis. RNA length standards shown on left (nt). Predicted secondary structures are shown below. See Table S2 for sequences. *B*, N protein in complex with mSL8 RNA was separated by glycerol gradient centrifugation in the presence of crosslinker (GraFix) and analyzed by native gel electrophoresis. RNA length standard shown on left (nt). *C*, Fractions 7 and 8 of GraFix-purified N-mSL8 vRNPs (from *B*) were combined and analyzed by mass photometry. Representative of two independent experiments (Table S1).

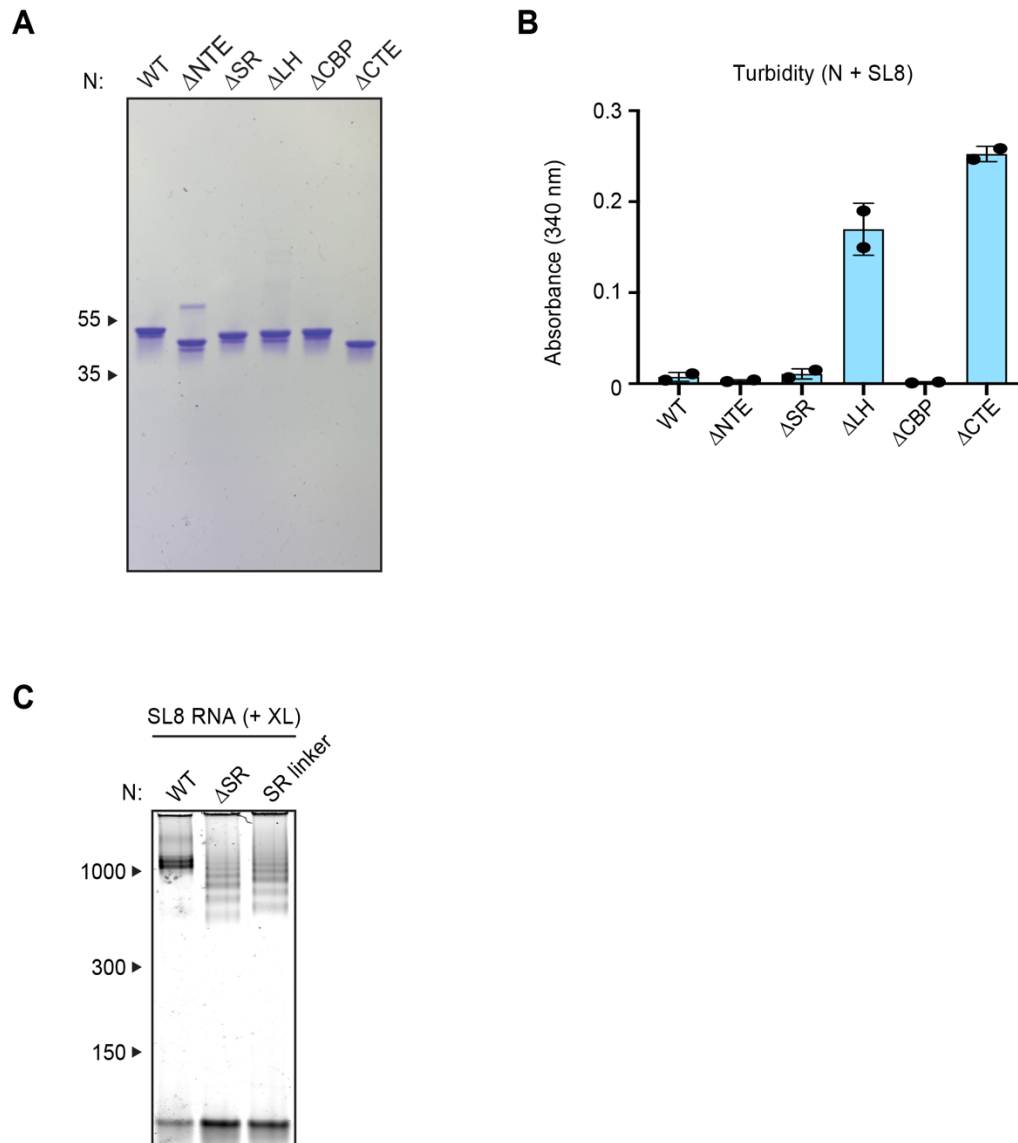

**Figure S3. Analysis of N protein mutants.** A, SDS-PAGE of N protein constructs, stained with Coomassie Blue. Molecular mass markers at left (kDa). B, Absorbance at 340 nm was used to quantify the turbidity of wild-type and mutant N proteins mixed with SL8 RNA. All values are normalized to absorbance at 260 nm. Bars indicate means  $\pm$  SD (n=2). C, 16  $\mu$ M N protein mutants were mixed with 256 ng/ $\mu$ l SL8 RNA, crosslinked, and analyzed by native gel electrophoresis. RNA length standards shown on left (nt). In the SR linker mutant, amino acids 176 to 206 are replaced with the sequence GASGGAGASGGAGASGGAGASGGAGASGGAA.

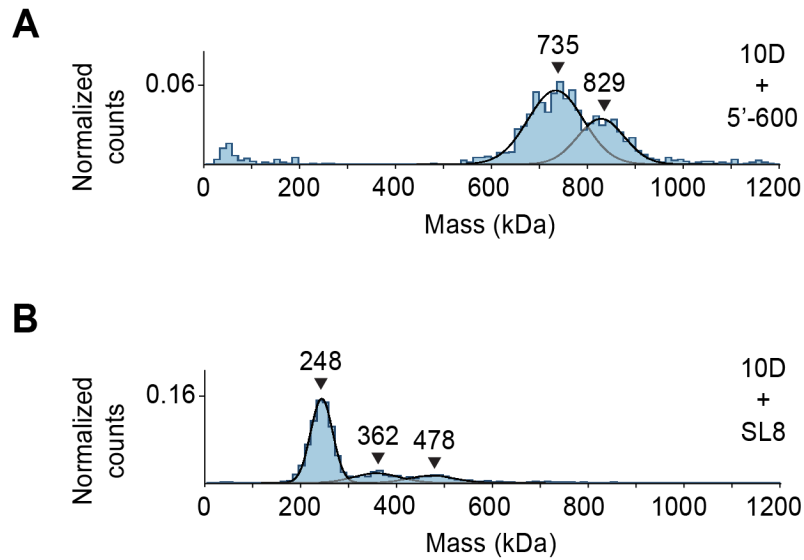

**Figure S4. Analysis of complex formation by 10D mutant.** Mass photometry analysis of GraFix-purified fractions 7 + 8 of 10D protein in complex with 5'-600 RNA (A) and fractions 19 + 20 of 10D protein in complex with SL8 RNA (B). Representative of two independent experiments (Table S1).

**Table S1. Summary of mass photometry results (kDa).**

| Figure 1  |       |           |             |       |           |            |       |           |                |
|-----------|-------|-----------|-------------|-------|-----------|------------|-------|-----------|----------------|
| Figure 1C |       |           |             |       |           |            |       |           |                |
| 5'-400    |       |           | 5'-600      |       |           | 5'-800     |       |           |                |
| rep 1     | rep 2 | mean ± SD | rep 1       | rep 2 | mean ± SD | rep 1      | rep 2 | mean ± SD |                |
| 1         | 630   | 631       | 630.5 ± 0.7 | 802   | 853       | 827.5 ± 36 | 756   | 721       | 738.5 ± 24.7   |
| 2         | 739   | 728       | 733.5 ± 7.8 |       |           |            | 1418  | 1613      | 1515.5 ± 137.9 |

  

| Figure 1E |       |           |             |       |           |           |
|-----------|-------|-----------|-------------|-------|-----------|-----------|
| -XL       |       |           | +XL         |       |           |           |
| rep 1     | rep 2 | mean ± SD | rep 1       | rep 2 | mean ± SD |           |
| 1         | 95    | 98        | 96.5 ± 2.2  | 724   | 714       | 719 ± 7.1 |
| 2         | 202   | 211       | 206.5 ± 6.4 |       |           |           |
| 3         | 761   | 770       | 765.5 ± 6.4 |       |           |           |

  

| Figure 2   |       |           |            |       |           |                           |       |       |           |              |
|------------|-------|-----------|------------|-------|-----------|---------------------------|-------|-------|-----------|--------------|
| Figure 2D  |       |           |            |       |           |                           |       |       |           |              |
| -SL8 / -XL |       |           | +SL8 / -XL |       |           | +SL8 / +XL (from Fig S1B) |       |       |           |              |
| rep 1      | rep 2 | mean ± SD | rep 1      | rep 2 | mean ± SD | rep 1                     | rep 2 | rep 3 | mean ± SD |              |
| 1          | 96    | 98        | 97 ± 1.4   | 110   | 105       | 107.5 ± 3.5               | 732   | 728   | 749       | 736.5 ± 11.2 |
| 2          | 196   | 202       | 199 ± 4.2  | 232   | 218       | 225 ± 9.9                 | 840   | 829   | 852       | 840.3 ± 11.5 |
| 3          |       |           |            | 361   | 358       | 359.5 ± 2.1               |       |       |           |              |
| 4          |       |           |            | 487   | 448       | 467.5 ± 27.6              |       |       |           |              |
| 5          |       |           |            | 622   | 578       | 600 ± 31.1                |       |       |           |              |
| 6          |       |           |            | 755   | 717       | 736 ± 26.9                |       |       |           |              |

  

| Figure 3          |       |       |           |              |       |           |              |       |              |              |
|-------------------|-------|-------|-----------|--------------|-------|-----------|--------------|-------|--------------|--------------|
| Figure 3D         |       |       |           |              |       |           |              |       |              |              |
| WT (from Fig S1B) |       |       |           | ΔNTE         |       |           | ΔSR          |       |              |              |
| rep 1             | rep 2 | rep 3 | mean ± SD | rep 1        | rep 2 | mean ± SD | rep 1        | rep 2 | mean ± SD    |              |
| 1                 | 732   | 728   | 749       | 736.5 ± 11.2 | 701   | 702       | 701.5 ± 1    | 236   | 224          | 230 ± 8.5    |
| 2                 | 840   | 829   | 852       | 840.3 ± 11.5 | 775   | 804       | 789.5 ± 20.5 | 357   | 324          | 340.5 ± 23.3 |
| 3                 |       |       |           |              |       |           | 472          | 432   | 452 ± 28.3   |              |
| 4                 |       |       |           |              |       |           | 589          | 552   | 570.5 ± 26.2 |              |
| 5                 |       |       |           |              |       |           | 706          | 689   | 697.5 ± 12   |              |
| 6                 |       |       |           |              |       |           | 844          | 831   | 837.5 ± 9.2  |              |

  

| Figure 3D (continued) |       |           |             |       |           |              |       |           |     |
|-----------------------|-------|-----------|-------------|-------|-----------|--------------|-------|-----------|-----|
| ΔLH                   |       |           | ΔCBP        |       |           | ΔCTE         |       |           |     |
| rep 1                 | rep 2 | mean ± SD | rep 1       | rep 2 | mean ± SD | rep 1        | rep 2 | mean ± SD |     |
| 1                     | 100   | 113       | 106.5 ± 9.2 | 92    | 107       | 99.5 ± 10.6  | n/a   | n/a       | n/a |
| 2                     | 214   | 230       | 222 ± 11.3  | 200   | 215       | 207.5 ± 10.6 |       |           |     |
| 3                     | 335   | 345       | 340 ± 7.1   | 303   | 332       | 317.5 ± 20.5 |       |           |     |
| 4                     |       |           |             | 428   | 436       | 432 ± 5.7    |       |           |     |
| 5                     |       |           |             | 562   | 568       | 565 ± 4.2    |       |           |     |
| 6                     |       |           |             |       |           |              |       |           |     |

  

| Figure 4          |       |       |           |                  |       |           |              |       |           |              |
|-------------------|-------|-------|-----------|------------------|-------|-----------|--------------|-------|-----------|--------------|
| Figure 4D         |       |       |           |                  |       |           |              |       |           |              |
| WT (from Fig S1B) |       |       |           | ΔSR (from fig 3) |       |           | 10D          |       |           |              |
| rep 1             | rep 2 | rep 3 | mean ± SD | rep 1            | rep 2 | mean ± SD | rep 1        | rep 2 | mean ± SD |              |
| 1                 | 732   | 728   | 749       | 736.5 ± 11.2     | 236   | 224       | 230 ± 8.5    | 231   | 230       | 230.5 ± 0.7  |
| 2                 | 840   | 829   | 852       | 840.3 ± 11.5     | 357   | 324       | 340.5 ± 23.3 | 346   | 348       | 347 ± 1.4    |
| 3                 |       |       |           |                  | 472   | 432       | 452 ± 28.3   | 456   | 452       | 454 ± 2.8    |
| 4                 |       |       |           |                  | 589   | 552       | 570.5 ± 26.2 | 569   | 540       | 554.5 ± 20.5 |
| 5                 |       |       |           |                  | 706   | 689       | 697.5 ± 12   |       |           |              |
| 6                 |       |       |           |                  | 844   | 831       | 837.5 ± 9.2  |       |           |              |

  

| Figure 5      |       |           |                          |       |           |           |
|---------------|-------|-----------|--------------------------|-------|-----------|-----------|
| Figure 5D     |       |           |                          |       |           |           |
| WT (+kinases) |       |           | S188A + S206A (+kinases) |       |           |           |
| rep 1         | rep 2 | mean ± SD | rep 1                    | rep 2 | mean ± SD |           |
| 1             | 235   | 207       | 221 ± 19.8               | 736   | 730       | 733 ± 4.2 |
| 2             | 335   | 308       | 321.5 ± 19.1             |       |           |           |
| 3             | 445   | 447       | 446 ± 1.4                |       |           |           |

  

| Figure S1  |       |           |              |       |           |              |       |       |           |              |
|------------|-------|-----------|--------------|-------|-----------|--------------|-------|-------|-----------|--------------|
| Figure S1B |       |           |              |       |           |              |       |       |           |              |
| SL4a       |       |           | SL7          |       |           | SL8          |       |       |           |              |
| rep 1      | rep 2 | mean ± SD | rep 1        | rep 2 | mean ± SD | rep 1        | rep 2 | rep 3 | mean ± SD |              |
| 1          | 528   | 501       | 514.5 ± 19.1 | 520   | 484       | 502 ± 25.5   | 732   | 728   | 749       | 736.5 ± 11.2 |
| 2          | 742   | 735       | 738.5 ± 4.9  | 630   | 599       | 614.5 ± 21.9 | 840   | 829   | 852       | 840.3 ± 11.5 |
| 3          | 876   | 875       | 875.5 ± 0.7  | 722   | 703       | 712.5 ± 13.4 |       |       |           |              |

  

| Figure S1D   |       |           |             |
|--------------|-------|-----------|-------------|
| SL8 (GRAFIX) |       |           |             |
| rep 1        | rep 2 | mean ± SD |             |
| 1            | 743   | 736       | 739.5 ± 4.9 |

  

| Figure S2         |       |           |           |
|-------------------|-------|-----------|-----------|
| Figure S2C        |       |           |           |
| WT +mSL8 (GRAFIX) |       |           |           |
| rep 1             | rep 2 | mean ± SD |           |
| 1                 | 759   | 773       | 766 ± 9.9 |

  

| Figure S4             |       |           |           |
|-----------------------|-------|-----------|-----------|
| Figure S4A            |       |           |           |
| 10D + 5'-600 (GRAFIX) |       |           |           |
| rep 1                 | rep 2 | mean ± SD |           |
| 1                     | 735   | 725       | 730 ± 7.1 |
| 2                     | 829   | 817       | 823 ± 8.5 |

  

| Figure S4B         |       |           |             |
|--------------------|-------|-----------|-------------|
| 10D + SL8 (GRAFIX) |       |           |             |
| rep 1              | rep 2 | mean ± SD |             |
| 1                  | 248   | 249       | 248.5 ± 0.7 |
| 2                  | 362   | 367       | 364.5 ± 3.5 |
| 3                  | 478   | 487       | 482.5 ± 6.4 |

**Table S2. RNA sequences used in this study.**

|        |                                                                                                                                                                                                                                                                                                                                                                                                                                                                                                                                                                                                                                                                                                                                                                                                                                                                                                                                                                                                                                                                                                                                                                             |
|--------|-----------------------------------------------------------------------------------------------------------------------------------------------------------------------------------------------------------------------------------------------------------------------------------------------------------------------------------------------------------------------------------------------------------------------------------------------------------------------------------------------------------------------------------------------------------------------------------------------------------------------------------------------------------------------------------------------------------------------------------------------------------------------------------------------------------------------------------------------------------------------------------------------------------------------------------------------------------------------------------------------------------------------------------------------------------------------------------------------------------------------------------------------------------------------------|
| 5'-400 | <p>                     auuaaaagguuuauaccuucccagguaacaaaccaaccaacuucgaucucuuguagaucuguucucu<br/>                     aaacgaacuuaaaaaucuguguggcugucacucggcugcaugcuuagugcacucacgcaguaauuu<br/>                     auaaacuaauuacugucguugacaggacacgaguaaacucgucuaucuuucugcaggcugcuuacgguu<br/>                     ucguccguguugcagccgaucaucagcacaucuagguuucguccgggugugaccgaaagguagaug<br/>                     gagagccuugucccugguuucaacgagaaaaacacacguccaacuacaguuugccuguuuuacagguuc<br/>                     gcgacgugcucguacguggcuuuggagacuccguggaggaggucuuauacagaggcacgucaacau                 </p>                                                                                                                                                                                                                                                                                                                                                                                                                                                                                                                                                                          |
| 5'-600 | <p>                     auuaaaagguuuauaccuucccagguaacaaaccaaccaacuucgaucucuuguagaucuguucucu<br/>                     aaacgaacuuaaaaaucuguguggcugucacucggcugcaugcuuagugcacucacgcaguaauuu<br/>                     auaaacuaauuacugucguugacaggacacgaguaaacucgucuaucuuucugcaggcugcuuacgguu<br/>                     ucguccguguugcagccgaucaucagcacaucuagguuucguccgggugugaccgaaagguagaug<br/>                     gagagccuugucccugguuucaacgagaaaaacacacguccaacuacaguuugccuguuuuacagguuc<br/>                     gcgacgugcucguacguggcuuuggagacuccguggaggaggucuuauacagaggcacgucaacaucu<br/>                     uaaagauggcacuuguggcuuaguagaaguugaaaaaggcguuuugccucaacuugaacagcccuau<br/>                     guguucaucaaacguucggaugcucgaacugcaccucauggucauguuauugguugagcugguagcag<br/>                     aacucgaaggcauucaguacggucguaguggugagacacuugguguccuuguccucaugugggg                 </p>                                                                                                                                                                                                                                                                                   |
| 5'-800 | <p>                     auuaaaagguuuauaccuucccagguaacaaaccaaccaacuucgaucucuuguagaucuguucucu<br/>                     aaacgaacuuaaaaaucuguguggcugucacucggcugcaugcuuagugcacucacgcaguaauuu<br/>                     auaaacuaauuacugucguugacaggacacgaguaaacucgucuaucuuucugcaggcugcuuacgguu<br/>                     ucguccguguugcagccgaucaucagcacaucuagguuucguccgggugugaccgaaagguagaug<br/>                     gagagccuugucccugguuucaacgagaaaaacacacguccaacuacaguuugccuguuuuacagguuc<br/>                     gcgacgugcucguacguggcuuuggagacuccguggaggaggucuuauacagaggcacgucaacaucu<br/>                     uaaagauggcacuuguggcuuaguagaaguugaaaaaggcguuuugccucaacuugaacagcccuau<br/>                     guguucaucaaacguucggaugcucgaacugcaccucauggucauguuauugguugagcugguagcag<br/>                     aacucgaaggcauucaguacggucguaguggugagacacuugguguccuuguccucauguggggcga<br/>                     aauaccaguggcuuaccgcaagguucuuucuaagaacgguaauaaaggagcugguggccauagu<br/>                     uacggcgccgaucuaaagucuuugacuuaggcgacgagcuuggcacugaucuuuaugaagauuuuc<br/>                     aagaaaacuggaacacuaaacauagcagugguguuacccgugaacucaugcgugagcuuaacg                 </p> |
| Nsp3   | <p>                     uuaugaaagacauucucucucucuauuuuguaacuuagacaaccugagagcuaauaacacuaaaggu<br/>                     ucauugccuauuaauguuauaguuuuugaugguaaaucaaaugugaagaaucaucugcaaaauca<br/>                     gcgucuguuuacuacagucagcuuauuguguaaccuauacuguuacuagaucaggcauuagugucug<br/>                     auguuggugauagugcggaaguugcaguuaaaauguuugaugcuuacguuaauacguuuucauaa<br/>                     cuuuuacguaccaauggaaaaacucuaaaacacuaaguugcaacugcagaagcugaacuugcaagaa<br/>                     uguguccuuagacaauugcuaucuaucuuuuuuuucagcagcucggcaaggguuuguugauucagau<br/>                     guagaaacuaaagauguuuguuugaugucuuuuuuuuugucacuaaauucugacauagaaguucuggc<br/>                     gauaguuguaauaacuaauaugcucaccuauaacaaguuugaauaacuagacaccccgugaccuuggug<br/>                     cuuguauugacugugagugcgucgucuauuuuuuuugcgcagguagcaaaaagucacaacauugcuuugau                 </p>                                                                                                                                                                                                                                                                                 |
| Nsp8/9 | <p>                     gccaugcaacguaaguuggaaaagauuggcugaucaagcuauagaccctaaauguaauaacaggcuagau<br/>                     cugaggacaagagggcaaaaguuacuagugcuauugcagacaauugcuuuucacuaugcuuagaaaguu<br/>                     ggauaaugaugcacucaacaacauuaucacaauugcaagagaugguuguguucccuugaacauaaua<br/>                     ccucuuacaacagcagccaaacuaaugguugucuaaccagacuuaacacauuaaaaauacgugug<br/>                     augguacaacauuuacuuauugcaucagcauugugggaaauccaacagguuguagaugcagauagua<br/>                     aaauuguucaacuuguaaaauaguuaggacaauucaccuauuuuagcauggccucuuuuuuuagac<br/>                     agcuuuuagggccaauucugcugucuaaaauacagaauuaugagcuuaguccuugcucacuacgacag                 </p>                                                                                                                                                                                                                                                                                                                                                                                                                                                                           |

|       |                                                                                                                                                                                                                                                                                                                                                                                                                                                                                                                                                                             |
|-------|-----------------------------------------------------------------------------------------------------------------------------------------------------------------------------------------------------------------------------------------------------------------------------------------------------------------------------------------------------------------------------------------------------------------------------------------------------------------------------------------------------------------------------------------------------------------------------|
|       | augucuugugcugccgguacuacacaaaacugcuugcacugaugacaauugcguuagcuuacuacaaca<br>caacaaagggagguagguuuuguacuugcacuguuauccgauuuacaggauuuugaaaugggcuaga                                                                                                                                                                                                                                                                                                                                                                                                                                |
| Nsp10 | ggaagccaauauggaucaagaauccuuugguggugcaucguguugucuguacuugccguugccaca<br>gaucauccaaauccuaaaggauuuugugacuuaaaagguaaguauacaauaccuacaacuugug<br>cuaaugaccugugguuuuacacuuaaaaaacacagucuguaccgucugcgguauguggaaagguua<br>uggcuguaguugugaucaacuccgcgaacccaugcuucagucagcugaugcacaucguuuuuaaac<br>ggguuugcgguguaagugcagcccugucuacaccgugcggcacaggcacuaguacugaugucguaua<br>cagggcuuuugacaucuacaauagauaaaguagcugguuuugcuuuuuccuaaaaaacuaauuguug<br>ucgcuuccaagaaaaggacgaagauacaauuuuauuuuacuuaaggauuugcagcuguugcuaaac<br>augacuucuuuaaguuuagaauagacggugacaugguaccacauauaucacgucaacgucuuacu |
| SL4a  | uuaaaaucuguguggcugucacucggcugcaugcuuagugcacucacgcaguauaa                                                                                                                                                                                                                                                                                                                                                                                                                                                                                                                    |
| SL7   | acguggcuuuggagacuccguggaggaggucuuauacagaggcacgu                                                                                                                                                                                                                                                                                                                                                                                                                                                                                                                             |
| SL8   | gauggcacuuguggcuuaguagaaguugaaaaaggcguuuugccucaacuugaacagcccuauugugu<br>ucauc                                                                                                                                                                                                                                                                                                                                                                                                                                                                                               |
| mSL8  | gauAgcaAuuguAAcuuaguagUCACGgaaaaagUcguuuugccucaacuugaacagcccuauA<br>ugAucauc<br>(mutant bases are capitalized)                                                                                                                                                                                                                                                                                                                                                                                                                                                              |
